# Supplementary material for: Chronic pain, depression and cardiovascular disease linked through a shared genetic predisposition: Analysis of a family-based cohort and twin study
Source: PubMed Central journal article supplement (PMC5321424; doi:10.1371/journal.pone.0170653), 2017-02-22
Supplement: pone.0170653.s001.pdf [file pone.0170653.s001.pdf]

**S1 Table. The effect of depression and/or angina on the occurrence of chronic pain in GS: SFHS overall and stratified according to gender.**

| Exposure                                                     | Outcome      | Group                     | Unadjusted |                                        | Adjusted |                                       |
|--------------------------------------------------------------|--------------|---------------------------|------------|----------------------------------------|----------|---------------------------------------|
|                                                              |              |                           | N          | OR [95% CI]                            | N        | OR [95% CI]                           |
| <b>Chronic pain in the presence of depression</b>            |              |                           |            |                                        |          |                                       |
| Depression                                                   | Chronic pain | Overall <sup>†</sup>      | 13, 376    | 2.80 <sup>a</sup><br>[2.52 to 3.11]    | 11,679   | 2.64 <sup>a</sup><br>[2.34 to 2.97]   |
|                                                              |              | Females only <sup>‡</sup> | 7,845      | 2.57 <sup>a</sup><br>[2.27 to 2.91]    | 6,832    | 2.63 <sup>a</sup><br>[2.29 to 3.03]   |
|                                                              |              | Males only <sup>‡</sup>   | 5, 531     | 2.71 <sup>a</sup><br>[2.21 to 3.32]    | 4,847    | 2.61 <sup>a</sup><br>[2.07 to 3.28]   |
| <b>Chronic pain in the presence of angina</b>                |              |                           |            |                                        |          |                                       |
| Angina                                                       | Chronic pain | Overall <sup>†</sup>      | 14,564     | 5.44 <sup>a</sup><br>[4.83 to 6.13]    | 11,973   | 4.19 <sup>a</sup><br>[3.64 to 4.82]   |
|                                                              |              | Females only <sup>‡</sup> | 8,720      | 6.13 <sup>a</sup><br>[5.26 to 7.16]    | 7,193    | 4.95 <sup>a</sup><br>[4.13 to 5.93]   |
|                                                              |              | Males only <sup>‡</sup>   | 5,844      | 4.93 <sup>a</sup><br>[4.06 to 5.99]    | 4,780    | 3.20 <sup>a</sup><br>[2.54 to 4.04]   |
| <b>Chronic pain in the presence of depression and angina</b> |              |                           |            |                                        |          |                                       |
| Depression and angina                                        | Chronic pain | Overall <sup>†</sup>      | 9,728      | 13.28 <sup>a</sup><br>[10.02 to 17.59] | 8,543    | 9.43 <sup>a</sup><br>[6.85 to 12.98]  |
|                                                              |              | Females only <sup>‡</sup> | 5,644      | 13.20 <sup>a</sup><br>[9.34 to 18.66]  | 4,956    | 10.24 <sup>a</sup><br>[6.93 to 15.13] |
|                                                              |              | Males only <sup>‡</sup>   | 4,084      | 11.77 <sup>a</sup><br>[7.16 to 19.37]  | 3,587    | 8.01 <sup>a</sup><br>[4.54 to 14.12]  |

<sup>†</sup>valid data adjusted for age, gender, education, SIMD and smoking status; overall results are also shown in Table 3

<sup>‡</sup>valid data adjusted for age, education, SIMD and smoking status;

<sup>a</sup>= p<0.001
