# Supplementary material for: Chronic pain, depression and cardiovascular disease linked through a shared genetic predisposition: Analysis of a family-based cohort and twin study
Source: PubMed Central journal article supplement (PMC5321424; doi:10.1371/journal.pone.0170653), 2017-02-22
Supplement: pone.0170653.s002.pdf [file pone.0170653.s002.pdf]

**S2 Table. The effect of comorbidity on the occurrence of depression and/or angina in GS: SFHS overall and stratified according to gender.**

| Exposure                                                     | Outcome    | Group                     | Unadjusted |                                       | Adjusted |                                       |
|--------------------------------------------------------------|------------|---------------------------|------------|---------------------------------------|----------|---------------------------------------|
|                                                              |            |                           | N          | OR [95% CI]                           | N        | OR [95% CI]                           |
| <b>Depression in the presence of chronic pain</b>            |            |                           |            |                                       |          |                                       |
| Chronic Pain                                                 | Depression | Overall <sup>†</sup>      | 13,376     | 2.80 <sup>a</sup><br>[2.52 to 3.11]   | 11,679   | 2.62 <sup>a</sup><br>[2.32 to 2.96]   |
|                                                              |            | Females only <sup>‡</sup> | 7,845      | 2.57 <sup>a</sup><br>[2.27 to 2.91]   | 6,832    | 2.63 <sup>a</sup><br>[2.28 to 3.03]   |
|                                                              |            | Males only <sup>‡</sup>   | 5,531      | 2.71 <sup>a</sup><br>[2.21 to 3.32]   | 4,847    | 2.58 <sup>a</sup><br>[2.04 to 3.25]   |
| <b>Depression in the presence of angina</b>                  |            |                           |            |                                       |          |                                       |
| Angina                                                       | Depression | Overall <sup>†</sup>      | 16,224     | 2.18 <sup>a</sup><br>[1.92 to 2.47]   | 14,121   | 2.10 <sup>a</sup><br>[1.82 to 2.43]   |
|                                                              |            | Females only <sup>‡</sup> | 9,669      | 2.13 <sup>a</sup><br>[1.82 to 2.48]   | 8,379    | 2.05 <sup>a</sup><br>[1.72 to 2.45]   |
|                                                              |            | Males only <sup>‡</sup>   | 6,555      | 2.43 <sup>a</sup><br>[1.94 to 3.03]   | 5,742    | 2.20 <sup>a,d</sup><br>[1.71 to 2.84] |
| <b>Depression in the presence of chronic pain and angina</b> |            |                           |            |                                       |          |                                       |
| Chronic pain and angina                                      | Depression | Overall <sup>†</sup>      | 9,461      | 4.36 <sup>a</sup><br>[3.58 to 5.30]   | 8,297    | 3.78 <sup>a</sup><br>[2.99 to 4.78]   |
|                                                              |            | Females only <sup>‡</sup> | 5,480      | 3.91 <sup>a</sup><br>[3.10 to 4.91]   | 4,805    | 3.76 <sup>a,b</sup><br>[2.87 to 4.94] |
|                                                              |            | Males only <sup>‡</sup>   | 3,981      | 4.77 <sup>a</sup><br>[3.26 to 6.97]   | 3,492    | 3.86 <sup>a,c</sup><br>[2.49 to 5.99] |
| <b>Angina in the presence of chronic pain</b>                |            |                           |            |                                       |          |                                       |
| Chronic pain                                                 | Angina     | Overall <sup>†</sup>      | 14,564     | 5.45 <sup>a</sup><br>[4.84 to 6.14]   | 11,973   | 4.23 <sup>a</sup><br>[3.67 to 4.86]   |
|                                                              |            | Females only <sup>‡</sup> | 8,720      | 6.13 <sup>a</sup><br>[5.26 to 7.16]   | 7,193    | 4.97 <sup>a</sup><br>[4.16 to 5.95]   |
|                                                              |            | Males only <sup>‡</sup>   | 5,844      | 4.93 <sup>a</sup><br>[4.06 to 5.99]   | 4,780    | 3.31 <sup>a,e</sup><br>[2.63 to 4.17] |
| <b>Angina in the presence of depression</b>                  |            |                           |            |                                       |          |                                       |
| Depression                                                   | Angina     | Overall <sup>†</sup>      | 16,224     | 2.18 <sup>a</sup><br>[1.92 to 2.47]   | 14,121   | 2.20 <sup>a</sup><br>[1.90 to 2.54]   |
|                                                              |            | Females only <sup>‡</sup> | 9,669      | 2.13 <sup>a</sup><br>[1.82 to 2.48]   | 8,379    | 2.11 <sup>a</sup><br>[1.77 to 2.52]   |
|                                                              |            | Males only <sup>‡</sup>   | 6,555      | 2.43 <sup>a</sup><br>[1.94 to 3.03]   | 5,742    | 2.37 <sup>a,f</sup><br>[1.83 to 3.06] |
| <b>Angina in the presence of chronic pain and depression</b> |            |                           |            |                                       |          |                                       |
| Chronic pain and depression                                  | Angina     | Overall <sup>†</sup>      | 9,003      | 9.15 <sup>a</sup><br>[7.43 to 11.26]  | 7,919    | 7.76 <sup>a</sup><br>[6.05 to 9.95]   |
|                                                              |            | Females only <sup>‡</sup> | 5,120      | 10.19 <sup>a</sup><br>[7.91 to 13.12] | 4,506    | 7.77 <sup>a</sup><br>[5.79 to 10.42]  |

|  |  |                         |       |                                      |       |                                         |
|--|--|-------------------------|-------|--------------------------------------|-------|-----------------------------------------|
|  |  | Males only <sup>‡</sup> | 3,883 | 9.85 <sup>a</sup><br>[6.52 to 14.88] | 3,413 | 8.45 <sup>a, g</sup><br>[5.25 to 13.59] |
|--|--|-------------------------|-------|--------------------------------------|-------|-----------------------------------------|

<sup>†</sup>valid data adjusted for age, gender, education, SIMD and smoking status; overall results are also reported in Table 3; <sup>‡</sup>valid data adjusted for age, education, SIMD and smoking status;

a= p<0.001; b = Variable removed from model, SIMD P=0.62; c= Variable removed from model, Age P=0.21; d = Variable removed from model: education P=0.18; e = Variable removed from model: education P=0.80; f= Variable removed from model: education P=0.12; g = Variables removed from model: SIMD P=0.45 and Education P=0.30
