# Supplementary material for: Chronic pain, depression and cardiovascular disease linked through a shared genetic predisposition: Analysis of a family-based cohort and twin study
Source: PubMed Central journal article supplement (PMC5321424; doi:10.1371/journal.pone.0170653), 2017-02-22
Supplement: pone.0170653.s003.pdf [file pone.0170653.s003.pdf]

**S3 Table. The effect of chronic pain on the occurrence of depression and/or angina in the “unrelated” subgroup (n=9,163) and stratified according to gender.**

| Exposure                                                     | Outcome      | Group                     | Unadjusted |                                       | Adjusted |                                         |
|--------------------------------------------------------------|--------------|---------------------------|------------|---------------------------------------|----------|-----------------------------------------|
|                                                              |              |                           | N          | OR [95% CI]                           | N        | OR [95% CI]                             |
| <b>Chronic pain in the presence of depression</b>            |              |                           |            |                                       |          |                                         |
| Depression                                                   | Chronic pain | Overall <sup>†</sup>      | 4,780      | 2.70 <sup>a</sup><br>[2.26 to 3.23]   | 4,179    | 2.46 <sup>a</sup><br>[2.02 to 3.01]     |
|                                                              |              | Females only <sup>‡</sup> | 2,743      | 2.64 <sup>a</sup><br>[2.13 to 3.26]   | 2,385    | 2.66 <sup>a</sup><br>[2.09 to 3.37]     |
|                                                              |              | Males only <sup>‡</sup>   | 2,037      | 2.25 <sup>a</sup><br>[1.59 to 3.17]   | 1,794    | 2.10 <sup>a, b</sup><br>[1.44 to 3.07]  |
| <b>Chronic pain in the presence of angina</b>                |              |                           |            |                                       |          |                                         |
| Angina                                                       | Chronic pain | Overall <sup>†</sup>      | 5,113      | 4.26 <sup>a</sup><br>[3.60 to 5.03]   | 4,267    | 3.70 <sup>a</sup><br>[3.04 to 4.51]     |
|                                                              |              | Females only <sup>‡</sup> | 3,006      | 5.04 <sup>a</sup><br>[4.03 to 6.30]   | 2,505    | 4.54 <sup>a</sup><br>[3.50 to 5.89]     |
|                                                              |              | Males only <sup>‡</sup>   | 2,107      | 3.64 <sup>a</sup><br>[2.79 to 4.75]   | 1,762    | 2.87 <sup>a, c</sup><br>[2.11 to 3.91]  |
| <b>Chronic pain in the presence of depression and angina</b> |              |                           |            |                                       |          |                                         |
| Depression and angina                                        | Chronic pain | Overall <sup>†</sup>      | 3,380      | 12.31 <sup>a</sup><br>[7.83 to 19.35] | 2,967    | 8.70 <sup>a</sup><br>[5.23 to 14.46]    |
|                                                              |              | Females only <sup>‡</sup> | 1,922      | 13.76 <sup>a</sup><br>[7.73 to 24.48] | 1,678    | 12.78 <sup>a</sup><br>[6.47 to 25.25]   |
|                                                              |              | Males only <sup>‡</sup>   | 1,458      | 8.71 <sup>a</sup><br>[4.06 to 18.69]  | 1,289    | 5.20 <sup>a, d</sup><br>[2.25 to 12.04] |

<sup>†</sup>valid data adjusted for age, gender, education, SIMD and smoking status; <sup>‡</sup>valid data adjusted for age, education, SIMD and smoking status; a= p<0.001; b= Variables not in final model: age (P=0.97) and smoking status (P=0.17) ; c= Variables not in final model: age (P= 0.86); smoking status (P=0.13); d= Variables not in final model: age (P= 0.89); smoking status (P=0.50)
