# Supplementary material for: Chronic pain, depression and cardiovascular disease linked through a shared genetic predisposition: Analysis of a family-based cohort and twin study
Source: PubMed Central journal article supplement (PMC5321424; doi:10.1371/journal.pone.0170653), 2017-02-22
Supplement: pone.0170653.s004.pdf [file pone.0170653.s004.pdf]

**S4 Table. The effect of depression on the occurrence of chronic pain and/or angina in the “unrelated” subgroup (n=9,163) and stratified according to gender.**

| Exposure                                                     | Outcome    | Group                     | Unadjusted |                                     | Adjusted |                                       |
|--------------------------------------------------------------|------------|---------------------------|------------|-------------------------------------|----------|---------------------------------------|
|                                                              |            |                           | N          | OR [95% CI]                         | N        | OR [95% CI]                           |
| <b>Depression in the presence of chronic pain</b>            |            |                           |            |                                     |          |                                       |
| Chronic Pain                                                 | Depression | Overall <sup>†</sup>      | 4,780      | 2.70 <sup>a</sup><br>[2.26 to 3.23] | 4,179    | 2.46 <sup>a,b</sup><br>[2.02 to 3.01] |
|                                                              |            | Females only <sup>‡</sup> | 2,743      | 2.64 <sup>a</sup><br>[2.13 to 3.26] | 2,385    | 2.74 <sup>a,c</sup><br>[2.16 to 3.46] |
|                                                              |            | Males only <sup>‡</sup>   | 2,037      | 2.25 <sup>a</sup><br>[1.59 to 3.17] | 1,794    | 2.05 <sup>a,d</sup><br>[1.41 to 2.98] |
| <b>Depression in the presence of angina</b>                  |            |                           |            |                                     |          |                                       |
| Angina                                                       | Depression | Overall <sup>†</sup>      | 6,264      | 2.08 <sup>a</sup><br>[1.73 to 2.51] | 5,453    | 2.08 <sup>a</sup><br>[1.67 to 2.60]   |
|                                                              |            | Females only <sup>‡</sup> | 3,662      | 2.08 <sup>a</sup><br>[1.66 to 2.62] | 3,165    | 2.07 <sup>a,e</sup><br>[1.59 to 2.69] |
|                                                              |            | Males only <sup>‡</sup>   | 2,602      | 2.28 <sup>a</sup><br>[1.63 to 3.21] | 2,288    | 2.25 <sup>a,f</sup><br>[1.52 to 3.33] |
| <b>Depression in the presence of chronic pain and angina</b> |            |                           |            |                                     |          |                                       |
| Chronic pain and angina                                      | Depression | Overall <sup>†</sup>      | 3,149      | 4.33 <sup>a</sup><br>[3.23 to 5.81] | 2,769    | 4.23 <sup>a,g</sup><br>[3.00 to 5.96] |
|                                                              |            | Females only <sup>‡</sup> | 1,783      | 4.10 <sup>a</sup><br>[2.90 to 5.80] | 1,566    | 4.77 <sup>a,h</sup><br>[3.23 to 7.05] |
|                                                              |            | Males only <sup>‡</sup>   | 1,366      | 4.12 <sup>a</sup><br>[2.34 to 7.27] | 1,203    | 3.96 <sup>a,i</sup><br>[2.05 to 7.66] |

<sup>†</sup>valid data adjusted for age, gender, education, SIMD and smoking status; <sup>‡</sup>valid data adjusted for age, education, SIMD and smoking status; a= p<0.001; b= Variables not in final model: Education (P=0.14); c= Variables not in final model: Education (P=0.38); SIMD (P=0.21); d= Variables not in final model: Education (P=0.20); SIMD (P=0.48); e= Variables not in final model: SIMD (P=0.30); f= Variables not in final model: Education (P=0.40); g= Variables not in final model: SIMD (P=0.12); Education (P=0.28); h= Variables not in final model: Smoking (P=0.10); SIMD (P=0.34); Education (P=0.22); i= Variables not in final model: SIMD (P=0.17); Education (P=0.94)
