# Supplementary material for: Chronic pain, depression and cardiovascular disease linked through a shared genetic predisposition: Analysis of a family-based cohort and twin study
Source: PubMed Central journal article supplement (PMC5321424; doi:10.1371/journal.pone.0170653), 2017-02-22
Supplement: pone.0170653.s005.pdf [file pone.0170653.s005.pdf]

**S5 Table. The effect of angina on the occurrence of depression and/or chronic pain in the “unrelated” subgroup (n=9,163) and stratified according to gender.**

| Exposure                                                     | Outcome | Group                     | Unadjusted |                                      | Adjusted |                                          |
|--------------------------------------------------------------|---------|---------------------------|------------|--------------------------------------|----------|------------------------------------------|
|                                                              |         |                           | N          | OR [95% CI]                          | N        | OR [95% CI]                              |
| <b>Angina in the presence of chronic pain</b>                |         |                           |            |                                      |          |                                          |
| Chronic pain                                                 | Angina  | Overall <sup>†</sup>      | 5,113      | 4.26 <sup>a</sup><br>[3.60 to 5.03]  | 4,267    | 3.76 <sup>a</sup><br>[3.09 to 4.58]      |
|                                                              |         | Females only <sup>‡</sup> | 3,006      | 5.04 <sup>a</sup><br>[4.03 to 6.30]  | 2,505    | 4.61 <sup>a</sup><br>[3.56 to 5.98]      |
|                                                              |         | Males only <sup>‡</sup>   | 2,107      | 3.64 <sup>a</sup><br>[2.79 to 4.75]  | 1,762    | 3.06 <sup>a, b</sup><br>[2.23 to 4.19]   |
| <b>Angina in the presence of depression</b>                  |         |                           |            |                                      |          |                                          |
| Depression                                                   | Angina  | Overall <sup>†</sup>      | 6,264      | 2.08 <sup>a</sup><br>[1.73 to 2.51]  | 5,453    | 2.25 <sup>a</sup><br>[1.80 to 2.80]      |
|                                                              |         | Females only <sup>‡</sup> | 3,662      | 2.08 <sup>a</sup><br>[1.66 to 2.62]  | 3,165    | 2.09 <sup>a</sup><br>[1.60 to 2.73]      |
|                                                              |         | Males only <sup>‡</sup>   | 2,602      | 2.28 <sup>a</sup><br>[1.63 to 3.21]  | 2,288    | 2.52 <sup>a, c</sup><br>[1.71 to 3.72]   |
| <b>Angina in the presence of chronic pain and depression</b> |         |                           |            |                                      |          |                                          |
| Chronic pain and depression                                  | Angina  | Overall <sup>†</sup>      | 3,054      | 7.32 <sup>a</sup><br>[5.35 to 10.00] | 2,695    | 8.13 <sup>a, d</sup><br>[5.58 to 11.84]  |
|                                                              |         | Females only <sup>‡</sup> | 1,698      | 8.13 <sup>a</sup><br>[5.58 to 11.86] | 1,493    | 7.66 <sup>a, e</sup><br>[4.97 to 11.80]  |
|                                                              |         | Males only <sup>‡</sup>   | 1,356      | 9.05 <sup>a</sup><br>[4.68 to 17.47] | 1,202    | 10.33 <sup>a, f</sup><br>[4.89 to 21.82] |

<sup>†</sup>valid data adjusted for age, gender, education, SIMD and smoking status; <sup>‡</sup>valid data adjusted for age, education, SIMD and smoking status; a= p<0.001; b= Variables not in final model: Smoking status (P=0.15); Education (P=0.47); c= Variables not in final model: Smoking status (P=0.26); d= Variables not in final model: Smoking status (P=0.12); Education (P=0.12); e= Variables not in final model: Smoking status (P=0.17); Education (P=0.14); f= Variables not in final model: Smoking status (P=0.28); Education (P=0.31); SIMD (P=0.18)
