# Supplementary material for: Chronic pain, depression and cardiovascular disease linked through a shared genetic predisposition: Analysis of a family-based cohort and twin study
Source: PubMed Central journal article supplement (PMC5321424; doi:10.1371/journal.pone.0170653), 2017-02-22
Supplement: pone.0170653.s006.pdf [file pone.0170653.s006.pdf]

**S6 Table. Unadjusted and adjusted ORs for co-occurrence of the same trait within sibling-pairs in GS:SFHS**

| Exposure (Sib1 status) | Outcome (Sib2 status) | Unadjusted |                           | Adjusted |                           | $\lambda_S$            |
|------------------------|-----------------------|------------|---------------------------|----------|---------------------------|------------------------|
|                        |                       | N          | OR [95% CI]               | N        | OR [95% CI]               |                        |
| Angina                 | Angina                | 4,866      | 3.21<br>[2.42 – 4.26] *** | 3,989    | 2.78<br>[2.00 – 3.86] *** | 2.31<br>[1.86 – 2.88]* |
| Depression             | Depression            | 4,425      | 2.25<br>[1.84 – 2.75] *** | 3,803    | 2.16<br>[1.73 – 2.70] *** | 1.65<br>[1.44 – 1.90]* |
| Chronic pain           | Chronic pain          | 3,415      | 3.30<br>[2.73 – 4.00] *** | 2,773    | 2.30<br>[1.83 – 2.89]***  | 1.84<br>[1.65 – 2.06]* |

$\lambda_S$  = sibling recurrence risk ratio; \*  $p \leq 0.05$ , \*\*  $p \leq 0.01$  & \*\*\*  $p \leq 0.001$
