# Supplementary material for: Chronic pain, depression and cardiovascular disease linked through a shared genetic predisposition: Analysis of a family-based cohort and twin study
Source: PubMed Central journal article supplement (PMC5321424; doi:10.1371/journal.pone.0170653), 2017-02-22
Supplement: pone.0170653.s007.pdf [file pone.0170653.s007.pdf]

**S7 Table. Unadjusted and adjusted ORs of angina, depression and chronic pain within in sib1 subset.**

| Exposure (Sib1 status) | Outcome (Sib1 status) | Gender                | Unadjusted                   |                            | Adjusted |                            |
|------------------------|-----------------------|-----------------------|------------------------------|----------------------------|----------|----------------------------|
|                        |                       |                       | N                            | OR                         | N        | OR                         |
| Angina                 | Chronic pain          | Overall               | 4,042                        | 5.87<br>[4.56 to 7.55] *** | 3,304    | 4.71<br>[3.52 to 6.31] *** |
|                        |                       | Female-only sib pairs | 2,451                        | 6.38<br>[4.55 to 8.95] *** | 2,001    | 4.98<br>[3.39 to 7.31] *** |
|                        |                       | Male-only sib pairs   | 1,584                        | 6.24<br>[4.19 to 9.28] *** | 1,303    | 4.28<br>[2.70 to 6.78] *** |
| Angina                 | Depression            | Overall               | As "depression-angina"       |                            | 3,875    | 1.69<br>[1.25 to 2.29] *** |
|                        |                       | Female-only sib pairs |                              |                            | 2,320    | 1.43<br>[0.9 to 2.12]      |
|                        |                       | Male-only sib pairs   |                              |                            | 1,555    | 2.23<br>[1.38 to 3.62] *** |
| Chronic pain           | Angina                | Overall               | As "angina-chronic pain"     |                            | 3,304    | 4.69<br>[3.50 to 6.28] *** |
|                        |                       | Female-only sib pairs |                              |                            | 2,001    | 4.98<br>[3.40 to 7.30] *** |
|                        |                       | Male-only sib pairs   |                              |                            | 1,303    | 4.35<br>[2.76 to 6.87] *** |
| Chronic pain           | Depression            | Overall               | 3,716                        | 2.89<br>[2.36 to 3.54] *** | 3,225    | 2.48<br>[1.96 to 3.13] *** |
|                        |                       | Female-only sib pairs | 2,214                        | 2.53<br>[1.99 to 3.22] *** | 1,915    | 2.33<br>[1.76 to 3.07] *** |
|                        |                       | Male-only sib pairs   | 1,494                        | 3.37<br>[2.32 to 4.90] *** | 1,310    | 2.94<br>[1.90 to 4.54] *** |
| Depression             | Angina                | Overall               | 4,470                        | 1.95<br>[1.50 to 2.54] *** | 3,875    | 1.71<br>[1.26 to 2.32] *** |
|                        |                       | Female-only sib pairs | 2,689                        | 1.67<br>[1.19 to 2.35] **  | 2,320    | 1.42<br>[0.96 to 2.11]     |
|                        |                       | Male-only sib pairs   | 1,771                        | 2.78<br>[1.83 to 4.24] *** | 1,555    | 2.42<br>[1.49 to 3.92] *** |
| Depression             | Chronic pain          | Overall               | As "chronic pain-depression" |                            | 3,225    | 2.52<br>[2.00 to 3.18] *** |
|                        |                       | Female-only sib pairs |                              |                            | 1,915    | 2.35<br>[1.78 to 3.10] *** |
|                        |                       | Male-only sib pairs   |                              |                            | 1,310    | 3.04<br>[1.9 to 4.68] ***  |

\*\* p<0.01, \*\*\* p<0.001
