# Supplementary material for: Chronic pain, depression and cardiovascular disease linked through a shared genetic predisposition: Analysis of a family-based cohort and twin study
Source: PubMed Central journal article supplement (PMC5321424; doi:10.1371/journal.pone.0170653), 2017-02-22
Supplement: pone.0170653.s008.pdf [file pone.0170653.s008.pdf]

**S8 Table. Unadjusted and adjusted ORs for co-occurrence of the same trait overall and within same-gender sibling-pairs.**

| Exposure (Sib1 status) | Outcome (Sib2 status) | Gender                | Unadjusted |                               | Adjusted |                               | $\lambda_s$             |
|------------------------|-----------------------|-----------------------|------------|-------------------------------|----------|-------------------------------|-------------------------|
|                        |                       |                       | N          | OR [95% CI]                   | N        | OR [95% CI]                   |                         |
| Angina                 | Angina                | Overall <sup>†</sup>  | 4,866      | 3.21<br>[2.42 to 4.26]<br>*** | 3,989    | 2.78<br>[2.00 to 3.86]<br>*** | 2.31<br>[1.86 to 2.88]* |
|                        |                       | Female-only sib pairs | 1,808      | 3.89<br>[2.44 to 6.21]<br>*** | 1,485    | 3.31<br>[1.94 to 5.63]<br>*** |                         |
|                        |                       | Male-only sib pairs   | 788        | 3.37<br>[1.68 to 6.76]<br>*** | 648      | 2.91<br>[1.29 to 6.57]<br>**  |                         |
| Depression             | Depression            | Overall <sup>†</sup>  | 4,425      | 2.25<br>[1.84 to 2.75]<br>*** | 3,803    | 2.16<br>[1.73 to 2.70]<br>*** | 1.65<br>[1.44 to 1.90]* |
|                        |                       | Female-only sib pairs | 1,641      | 2.83<br>[2.13 to 3.77]<br>*** | 1,393    | 2.97<br>[2.16 to 4.08]<br>*** |                         |
|                        |                       | Male-only sib pairs   | 766        | 2.21<br>[1.15 to 4.24]<br>*   | 666      | 2.19<br>[1.10 to 4.37]<br>*   |                         |
| Chronic pain           | Chronic pain          | Overall <sup>†</sup>  | 3,415      | 3.30<br>[2.73 to 4.00]<br>*** | 2,773    | 2.30<br>[1.83 to 2.89]<br>*** | 1.84<br>[1.65 to 2.06]* |
|                        |                       | Female-only sib pairs | 1,276      | 3.54<br>[2.65 to 4.73]<br>*** | 1,037    | 2.66<br>[1.89 to 3.75]<br>*** |                         |
|                        |                       | Male-only sib pairs   | 575        | 3.15<br>[1.75 to 5.67]<br>*** | 464      | 2.21<br>[1.09 to 4.48]<br>*   |                         |

$\lambda_s$  = sibling recurrence risk ratio; \*  $p \leq 0.05$ ; \*\*  $p \leq 0.01$ ; \*\*\*  $p \leq 0.001$ ; <sup>†</sup>overall results are also shown in Table 4
