# Supplementary material for: Chronic pain, depression and cardiovascular disease linked through a shared genetic predisposition: Analysis of a family-based cohort and twin study
Source: PubMed Central journal article supplement (PMC5321424; doi:10.1371/journal.pone.0170653), 2017-02-22
Supplement: pone.0170653.s009.pdf [file pone.0170653.s009.pdf]

**S9 Table. Unadjusted and adjusted ORs for cross-trait analysis of angina, depression and chronic pain overall and within same-gender sibling-pairs.**

| Exposure (Sib1 status) | Outcome (Sib2 status) | Gender                | Unadjusted |                               | Adjusted |                               |
|------------------------|-----------------------|-----------------------|------------|-------------------------------|----------|-------------------------------|
|                        |                       |                       | N          | OR                            | N        | OR                            |
| Angina                 | Chronic pain          | Overall <sup>†</sup>  | 4,014      | 2.61<br>[2.03 to 3.37]<br>*** | 3,275    | 2.19<br>[1.63 to 2.95]<br>*** |
|                        |                       | Female-only sib pairs | 1,475      | 2.36<br>[1.55 to 3.60]<br>*** | 1,207    | 2.12<br>[1.32 to 3.38]<br>**  |
|                        |                       | Male-only sib pairs   | 665        | 2.02<br>[1.03 to 3.92] *      | 537      | 0.96<br>[0.40 to 2.29]        |
| Angina                 | Depression            | Overall <sup>†</sup>  | 4,595      | 1.52<br>[1.16 to 1.99]<br>**  | 3,967    | 1.48<br>[1.09 to 2.01]<br>**  |
|                        |                       | Female-only sib pairs | 1,704      | 1.23<br>[0.80 to 1.90]        | 1,450    | 1.08<br>[0.65 to 1.78]        |
|                        |                       | Male-only sib pairs   | 768        | 1.44<br>[0.66 to 3.16]        | 672      | 1.43<br>[0.63 to 3.28]        |
| Chronic pain           | Angina                | Overall <sup>†</sup>  | 4,026      | 2.48<br>[1.93 to 3.19]<br>*** | 3,280    | 2.01<br>[1.49 to 2.71]<br>*** |
|                        |                       | Female-only sib pairs | 1,514      | 2.49<br>[1.67 to 3.73]<br>*** | 1,234    | 2.38<br>[1.47 to 3.84]<br>*** |
|                        |                       | Male-only sib pairs   | 660        | 2.41<br>[1.17 to 4.98] *      | 542      | 2.26<br>[0.96 to 5.31]        |
| Chronic pain           | Depression            | Overall <sup>†</sup>  | 3,831      | 1.84<br>[1.50 to 2.26]<br>*** | 3,295    | 1.69<br>[1.34 to 2.14]<br>*** |
|                        |                       | Female-only sib pairs | 1,428      | 1.69<br>[1.25 to 2.27]<br>*** | 1,210    | 1.53<br>[1.08 to 2.16] *      |
|                        |                       | Male-only sib pairs   | 643        | 2.24<br>[1.19 to 4.21]<br>**  | 562      | 2.09<br>[1.04 to 4.17] *      |
| Depression             | Angina                | Overall <sup>†</sup>  | 4,562      | 1.97<br>[1.54 to 2.54]<br>*** | 3,757    | 1.98<br>[1.49 to 2.65]<br>*** |
|                        |                       | Female-only sib pairs | 1,704      | 1.97<br>[1.32 to 2.94]<br>*** | 1,406    | 2.03<br>[1.29 to 3.20]<br>**  |
|                        |                       | Male-only sib pairs   | 769        | 2.92<br>[1.53 to 5.57]<br>*** | 634      | 2.38<br>[1.18 to 5.06] *      |
| Depression             | Chronic pain          | Overall <sup>†</sup>  | 3,796      | 1.30<br>[1.05 to 1.61] *      | 3,124    | 1.34                          |

|  |  |                              |       |                          |       |                        |
|--|--|------------------------------|-------|--------------------------|-------|------------------------|
|  |  |                              |       |                          |       | [1.05 to 1.71]<br>*    |
|  |  | Female-<br>only sib<br>pairs | 1,405 | 1.42<br>[1.04 to 1.93] * | 1,159 | 1.40<br>[0.98 to 1.99] |
|  |  | Male-<br>only<br>sib pairs   | 659   | 1.60<br>[0.86 to 2.96]   | 537   | 1.61<br>[0.79 to 3.25] |

$\lambda_s$  = sibling recurrence risk ratio ;  $p \leq 0.05$ ; \*\*  $p \leq 0.01$ ; \*\*\*  $p \leq 0.001$ ; † overall results are also shown in Table 5.
