# Supplementary material for: Chronic pain, depression and cardiovascular disease linked through a shared genetic predisposition: Analysis of a family-based cohort and twin study
Source: PubMed Central journal article supplement (PMC5321424; doi:10.1371/journal.pone.0170653), 2017-02-22
Supplement: pone.0170653.s010.pdf [file pone.0170653.s010.pdf]

**S10 Table. Model comparison between the full ACE Cholesky and the best balance of model fit with parsimony for chronic pain<sup>±</sup> and cardiovascular disease (n=2,902): Twins UK**

|                            | Difference of log likelihood | Difference of degree of freedom | P-value | AIC       | BIC       |
|----------------------------|------------------------------|---------------------------------|---------|-----------|-----------|
| Full ACE Cholesky model    | Base                         | Base                            | NA      | -5919.404 | -36506.49 |
| AE Cholesky model          | 5.226656                     | 3                               | 0.16    | -5920.177 | -36523.1  |
| Best fitting model (Fig 1) | 6.476206                     | 4                               | 0.17    | -5920.928 | -36529.14 |

A, additive genetic factors; C, shared environmental factors; E, non-shared environmental factors; D, non-additive genetic factors; <sup>±</sup>chronic widespread pain; AIC, Akaike information criterion; BIC, Schwarz's Bayesian information criteria; NA, not applicable.
